# Supplementary material for: Structural, electronic and catalytic properties of AgnSnn(n= 2–14) clusters by density functional theory
Source: Royal Society of Chemistry journal article supplement (doi:10.1039/d2cp01981g), 2022-01-01
Supplement: d2cp01981g2.pdf [file d2cp01981g2.pdf]

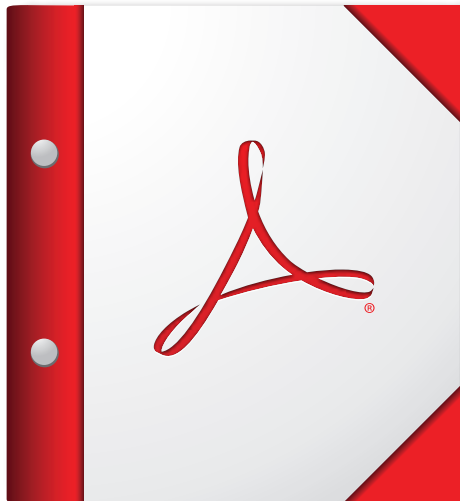

**For the best experience, open this PDF portfolio in  
Acrobat X or Adobe Reader X, or later.**

[Get Adobe Reader Now!](#)
